# Supplementary material
Source: publisher site journal article supplement (https://www.dovepress.com/article/581251)
Supplement: Supplementary file 1 [file 581251%20Revised%20Supplementary%20Material.docx]

**Supplementary Table S1. PRISMA 2020 checklist with manuscript locations**

| **Section/Topic** | **Item** | **Checklist Item** | **Location in Manuscript** |
| --- | --- | --- | --- |
| TITLE | 1 | Identify the report as a systematic review | Title page |
| ABSTRACT | 2 | Provide a structured summary including background, objectives, methods, results, and conclusions | Abstract |
| INTRODUCTION | 3 | Describe the rationale for the review in the context of existing knowledge | Introduction |
|  | 4 | Provide an explicit statement of the objectives or questions the review addresses | Introduction |
| METHODS | 5 | Specify the inclusion and exclusion criteria and provide a rationale | Methods: Eligibility Criteria |
|  | 6 | Specify all databases, registers, websites, organizations, reference lists and other sources searched | Methods: Information Sources |
|  | 7 | Present the full search strategies for all databases and sources | Supplementary Appendix S1 |
|  | 8 | Specify the methods used to decide whether a study met the inclusion criteria | Methods: Study Selection |
|  | 9 | Specify the methods used to collect data from reports | Methods: Data Extraction |
|  | 10 | List and define all the variables for which data were sought | Methods: Data Extraction |
|  | 11 | Specify the methods used to assess risk of bias in the included studies | Methods: Methodological Quality Assessment |
|  | 12 | Specify the effect measures used | Not applicable: narrative synthesis |
|  | 13 | Describe the methods used to combine results of studies | Methods: Data Synthesis |
|  | 14 | Describe any methods used to assess reporting biases | Methods: Methodological Quality Assessment |
|  | 15 | Describe any methods used to assess certainty (or confidence) in the body of evidence | Methods: Methodological Quality Assessment |
| RESULTS | 16 | Describe the results of the search and selection process | Results: Study Selection; Figure 1 |
|  | 17 | Cite each included study and present its characteristics | Results: Study Characteristics; Table 1; Supplementary Appendix S2 |
|  | 18 | Present assessments of risk of bias for each included study | Results: Methodological Quality Assessment; Figure 2; Supplementary Figure S1 |
|  | 19 | For all outcomes, present for each study: the summary statistic and its precision | Results: narrative synthesis; Tables 2–6 |
|  | 20 | Present results of all syntheses undertaken | Results: narrative synthesis; Supplementary Appendix S2 |
|  | 21 | Present results of any investigations of reporting biases | Limitations; Methodological Quality Assessment |
|  | 22 | Present assessments of certainty of evidence for each outcome assessed | Results: narrative synthesis; Supplementary Appendix S2 |
| DISCUSSION | 23 | Provide a general interpretation of the results in the context of other evidence | Discussion |
|  | 24 | Discuss limitations of the evidence included in the review | Limitations |
| OTHER | 24a | Provide registration information for the review | Methods: Protocol Registration; PROSPERO CRD420261335262 |
|  | 24b | Indicate where the review protocol can be accessed | Methods: Protocol Registration |
|  | 25 | Describe sources of financial support for the review | Funding |
|  | 26 | Declare any competing interests | Competing Interests |
|  | 27 | Report availability of data, code and other materials | Data Availability; Supplementary Appendix S2 |

This checklist reports compliance with the PRISMA 2020 reporting guidelines for systematic reviews. Each item is mapped to the corresponding location in the manuscript.

***Note.*** *PRISMA = Preferred Reporting Items for Systematic Reviews and Meta-Analyses. Items marked 'Not applicable' are those that do not apply to narrative synthesis reviews.*

# **Supplementary Appendix S1. Full Search Strategies**

This appendix reports the complete search strategies used for each database, formatted in accordance with PRISMA 2020 and PRISMA-S reporting expectations.

Databases searched: PubMed, APA PsycNet (including PsycINFO), and Google Scholar.

Final search date: March 2026.

Language restriction: English only.

Publication type: Peer-reviewed primary studies.

Additional method: Backward citation searching of included studies.

## **PubMed**

Combined MeSH terms and Title/Abstract free-text terms. English language restriction applied. Records available through March 2026.

(

(

"Artificial Intelligence"[Mesh]

OR "Natural Language Processing"[Mesh]

OR "Chatbots"[Mesh]

OR "generative AI"[Title/Abstract]

OR "generative artificial intelligence"[Title/Abstract]

OR "large language model*"[Title/Abstract]

OR LLM[Title/Abstract]

OR LLMs[Title/Abstract]

OR "conversational AI"[Title/Abstract]

OR chatbot*[Title/Abstract]

OR "AI chatbot*"[Title/Abstract]

)

AND

(

"Mental Health"[Mesh]

OR "Mental Disorders"[Mesh]

OR "Psychotherapy"[Mesh]

OR "Suicide, Attempted"[Mesh]

OR "Suicidal Ideation"[Mesh]

OR "mental health"[Title/Abstract]

OR psycholog*[Title/Abstract]

OR psychiatr*[Title/Abstract]

OR therap*[Title/Abstract]

OR depress*[Title/Abstract]

OR anxi*[Title/Abstract]

OR suicide*[Title/Abstract]

OR "crisis intervention"[Title/Abstract]

OR "emotional support"[Title/Abstract]

)

AND

(

"Computer Security"[Mesh]

OR "Confidentiality"[Mesh]

OR "Privacy"[Mesh]

OR cybersecurity[Title/Abstract]

OR privacy[Title/Abstract]

OR "data protection"[Title/Abstract]

OR "data breach*"[Title/Abstract]

OR vulnerab*[Title/Abstract]

OR "prompt injection"[Title/Abstract]

OR "adversarial attack*"[Title/Abstract]

OR governance[Title/Abstract]

OR safety[Title/Abstract]

OR safeguard*[Title/Abstract]

)

)

AND English[lang]

## **APA PsycNet / PsycINFO**

Title, abstract, and keyword/subject searching. English language. Peer-reviewed journal records through March 2026.

(

TI("generative AI" OR "large language model*" OR LLM OR chatbot* OR "conversational AI")

OR AB("generative AI" OR "large language model*" OR LLM OR chatbot* OR "conversational AI")

OR SU("generative AI" OR "large language model*" OR chatbot*)

)

AND

(

TI("mental health" OR psycholog* OR psychiatr* OR therap* OR depress* OR anxi* OR suicide*)

OR AB("mental health" OR psycholog* OR psychiatr* OR therap* OR depress* OR anxi* OR suicide*)

OR SU("mental health" OR psychotherapy OR depression OR anxiety OR suicide)

)

AND

(

TI(cybersecurity OR privacy OR "data protection" OR vulnerab* OR governance OR safety)

OR AB(cybersecurity OR privacy OR "data protection" OR vulnerab* OR governance OR safety)

OR SU(cybersecurity OR privacy OR confidentiality OR safety OR governance)

)

Limits: English; peer-reviewed journal article.

## **Google Scholar**

Simplified keyword strings used due to platform search-length and ranking limitations. Results sorted by relevance; first-ranked results screened until no additional eligible studies identified. 153 records retained for deduplication and screening.

"generative AI" OR "large language model" OR chatbot AND "mental health" AND (privacy OR cybersecurity OR safety)

"conversational AI" chatbot "mental health" privacy

"LLM" "mental health" cybersecurity

chatbot therapy suicide privacy security

**Supplementary Table S2. Extracted data across included studies (n = 33, selected variables)**

| **Author** | **Title** | **Publication year** | **Publication Type** | **Country/Region** | **Study Design** | **MH Domain** | **Target Population** | **Use Case of LLM** | **Risk Level** | **LLM Type** | **Deployment Context** | **Data Ownership** | **Sensitivity Level** | **PII Present** | **De-identification** | **Ethics Approval** | **Cybersecurity Risks** | **Privacy Risks** | **Safety Risks** |
| --- | --- | --- | --- | --- | --- | --- | --- | --- | --- | --- | --- | --- | --- | --- | --- | --- | --- | --- | --- |
| Berrezueta-Guzman et al.10 | Future of ADHD Care: Evaluating the Efficacy of ChatGPT in Therapy Enhancement | 2024 | Journal | Multi-country (Germany/Spain) | Delphi-informed feasibility / proof-of-concept evaluation | ADHD | Children with ADHD (indirect); ADHD experts/clinicians | Therapy enhancement, psychoeducation, planning support | High | General-purpose LLM | Simulated clinical-support use | Researchers | Moderate | No | Not applicable | NR | Not assessed | Minimal in study environment | Inaccurate or culturally insensitive therapy advice |
| Campbell et al.26 | An Examination of Generative AI Response to Suicide Inquires: Content Analysis | 2025 | Journal | USA | Content analysis across two phases of standardized suicide-related prompts | Suicide prevention / crisis support | General crisis-seeking users represented through prompts | Suicide inquiry response and crisis guidance | High | General-purpose generative AI | Consumer chatbot platforms | Researchers / platform providers | High | No | Not applicable | NR | Not assessed | Minimal in study environment | Incomplete escalation, variable empathy, unsafe or inconsistent guidance |
| Chametka et al.24 | Security and Privacy Perceptions of Mental Health Chatbots | 2023 | Conference | Canada | Survey with quantitative comparison and qualitative thematic analysis | Privacy and security perceptions around mental health chatbots | Adult adopters and non-adopters of MH chatbots | Disclosure, mood tracking, wellness exercises (perceived use) | High | Mental-health chatbot apps | Standalone consumer MH chatbot apps | Researchers | High | No | Anonymized survey responses | Yes | Device compromise, impersonation, coercion (perceived) | Data sharing, unauthorized access, storage concerns | Not experimentally evaluated |
| Chin et al.24 | Chatbots’ Empathetic Conversations and Responses: A Qualitative Study of Help-Seeking Queries on Depressive Moods Across 8 Commercial Conversational Agents | 2025 | Journal | Republic of Korea / Germany | Qualitative benchmarking study with platform comparison | Depressive mood / empathetic support | General help-seeking users represented by prompts | Emotional support responses to depressive or distress-related prompts | High | Conversational agents (mixed rule-based and AI-driven) | Standalone chatbot services | Platform providers / researchers | Moderate to High | No in evaluation prompts | NR | Yes | Not assessed | Logging and retention discussed conceptually | Inappropriate or non-empathetic responses |
| Cui et al.25 | Development and Evaluation of LLM-based Suicide Intervention Chatbot | 2025 | Journal | China | System development plus professional usability/intervention evaluation | Suicide intervention / suicidal ideation | Individuals with suicidal ideation (intended users); psychology professionals as evaluators | Self-help suicide intervention chatbot | High | Prompt-engineered general-purpose LLM | Standalone self-help crisis-support chatbot | Researchers | High | NR | NR | NR | Not assessed | Privacy concerns noted by evaluators | Unsafe or insufficient intervention in high-risk cases; not a substitute for clinicians |
| De Freitas et al.23 | Chatbots and Mental Health: Insights Into the Safety of Generative AI | 2024 | Journal | Multi-country (USA/Turkey) | Multi-study behavioral research: field evidence, performance test, experiment | Mental health crises / companion AI safety | General consumers / companion-AI users | Emotional support and crisis disclosure in companion AI use | High | Generative companion AI systems | Standalone companion-AI chatbots | Platform providers / researchers | High | Yes in source logs | Screening/filtering reported; formal anonymization limited | Yes | Black-box unpredictability; risky platform behavior | Exposure of sensitive crisis disclosures | Failure to recognize distress; harmful advice; poor empathy |
| Donnelly et al.30 | Automated Safety Plan Scoring in Outpatient Mental Health Settings Using Large Language Models: Exploratory Study | 2026 | Journal | USA | Exploratory benchmarking study against expert-coded gold standard | Suicide safety planning | Outpatient psychiatric patients (records used) | Automated quality auditing of written safety plans | High | General-purpose and reasoning LLMs | Clinical decision support / QA | Institution / researchers | High | No | Research-team deidentification | Yes | Not assessed | Low within deidentified study environment | Misclassification of safety-plan quality if used operationally |
| Dwyer et al.6 | Mindbench.ai: an actionable platform to evaluate the profile and performance of large language models in a mental healthcare context | 2025 | Journal | Multi-country | Methodology / platform development paper | Mental healthcare LLM evaluation | Patients, clinicians, researchers, developers, regulators (intended stakeholders) | Benchmarking and profiling infrastructure | High | General-purpose LLMs and LLM-based tools | Evaluation infrastructure | MindBench.ai / source tool owners | Low to Moderate | No | Not required | Not applicable | Profiles, but does not experimentally test, security characteristics | Assessed as a profile dimension | Part of platform rationale, not a tested intervention outcome |
| He & Chen38 | Power Distance and Psychological Safety in LLM Counseling: Effects on Self-Efficacy with Implications for Mental Health-Relevant Behavior Change | 2026 | Journal | China | Online vignette factorial experiment | Psychological safety / self-efficacy in LLM counseling-like guidance | General adult participants | Advisor-like coping / guidance interaction | Moderate | Custom-prompted LLM | Experimental counseling simulation | Researchers | Moderate | No | Anonymized | Yes | Not assessed | Not assessed | High-power-distance framing may undermine self-efficacy |
| Goldie et al. 32 | Practitioner Perspectives on the Uses of Generative AI Chatbots in Mental Health Care: Mixed Methods Study | 2025 | Journal | Australia | Mixed-methods practitioner study | Clinical practitioner perspectives on generative AI in mental health | Mental health practitioners | Clinical support, documentation, counseling, research support | High | General-purpose generative AI chatbots | Clinical support context | Researchers | Moderate | Possible in raw data | NR | Yes | Not assessed | Confidentiality and governance concerns | Harmful advice, liability, governance gaps |
| He et al.9 | Physician Versus Large Language Model Chatbot Responses to Web-Based Questions From Autistic Patients in Chinese: Cross-Sectional Comparative Analysis | 2024 | Journal | China | Cross-sectional comparative analysis | Autism spectrum disorder support | Autistic patients and physicians | Answering patient questions / information support | High | General-purpose LLMs | Standalone chatbot comparison | DXY platform / researchers | High | No | Questions and responses anonymized and randomized | Yes | Not assessed | Public consultation text still raises data-handling relevance | Lower-quality or inaccurate advice relative to physicians |
| Heinz et al.29 | Randomized Trial of a Generative AI Chatbot for Mental Health Treatment | 2025 | Journal | USA | Randomized controlled trial | Depression; anxiety; high-risk feeding and eating disorder symptoms | Clinically distressed adults | Generative AI therapy chatbot treatment | High | Expert-fine-tuned generative model | Clinical treatment and monitoring | Study team / institution | Extreme | Yes | HIPAA-aligned research handling | Yes | Cloud sync / access-control risks if deployed broadly | Large sensitive clinical datasets require strong governance | Symptom exacerbation if unsafe responses occur |
| Heston3 | Safety of Large Language Models in Addressing Depression | 2023 | Journal | USA | Comparative prompt-based safety evaluation | Depression and suicide risk | General public users of public mental-health conversational agents | Public-facing depression / suicide conversation support | High | Public ChatGPT-3.5-based agents | Standalone public conversational agents | Public repository / platform providers | High | No | Not applicable | NR | Not assessed | Minimal in study environment | Inadequate suicide-risk escalation and unsafe advice |
| Hipgrave et al.31 | Balancing risks and benefits: clinicians’ perspectives on the use of generative AI chatbots in mental healthcare | 2025 | Journal | Australia | Qualitative clinician-perspective study | General mental health clinical practice | Mental health clinicians | Mental-health support and clinical practice support | High | General-purpose generative AI chatbots | Clinical mental-health support context | Researchers | Moderate | Possible in raw data | NR | Yes | Not a technical assessment | Confidentiality and governance concerns | Hallucination, harmful advice, liability |
| Humphries et al.22 | A qualitative study assessing the acceptability of a multi-agent AI Chatbot for providing HIV and mental health support among men who have sex with men and transgender women in KwaZulu-Natal, South Africa | 2026 | Journal | South Africa | Qualitative acceptability study with crossover component | HIV-related mental health support | Men who have sex with men and transgender women | Counseling and HIV/mental-health support | High | Hybrid / multi-agent AI chatbot | Pilot support chatbot | Researchers / clinic | High | Yes | NR | Yes | Not assessed | Confidentiality concerns for stigmatized populations | Escalation / counseling-support concerns |
| Iftikhar et al.33 | How LLM Counselors Violate Ethical Standards in Mental Health Practice: A Practitioner-Informed Framework | 2025 | Conference | USA | Practitioner-informed socio-technical framework study | Mental-health counseling ethics | Individuals seeking emotional support (simulated); practitioner evaluators | AI-based counseling / therapeutic dialogue | High | Frontier general-purpose LLMs | Experimental counseling evaluation | Research team / practitioners | High | NR | NR | NR | Prompt-injection style misuse discussed | Sensitive-data leakage and contextual re-identification discussed | Deceptive empathy, poor collaboration, bias, crisis failures |
| Kneese et al.21 | A Chatbot for the Soul: Mental Health Care, Privacy, and Intimacy in AI-Based Conversational Agents | 2025 | Journal | USA | Qualitative case study with community red-teaming and focus groups | Emotional support, spirituality, privacy, intimacy | Undergraduate beta testers | Wellness / spirituality support chatbot | High | Hybrid wellness chatbot | Standalone wellness chatbot | Researchers / app context | High | Unclear | NR | Exempt | Potential breach exposure and data security concerns | Logging, retention, re-identification, disclosure concerns | Misinformation, inadequate guardrails, dependency |
| Kwesi et al.14 | Exploring User Security and Privacy Attitudes and Concerns Toward the Use of General-Purpose LLM Chatbots for Mental Health | 2025 | Conference | USA | Qualitative interview study | Mental-health security and privacy awareness | U.S. adults using general-purpose LLMs for MH support | Emotional support / informal self-help | High | General-purpose LLMs | Standalone consumer use | Researchers | High | No in analyzed dataset | Anonymized | Yes | Data leakage, hacking, unauthorized access, misuse | Re-identification, retention, resale, profiling, mistaken HIPAA assumptions | Harmful advice, misinformation, stigma reinforcement, weak crisis support |
| Lee et al.27 | Large Language Models Versus Expert Clinicians in Crisis Prediction Among Telemental Health Patients: Comparative Study | 2024 | Journal | USA | Comparative predictive modeling study | Suicide crisis prediction | Telemental health patients | Crisis-risk triage / prediction from intake text | High | General-purpose LLM | Research evaluation using deidentified intake text | Platform / researchers | High | Unclear in source; masked for study | Identifiers masked / deidentified | Yes | Not directly analyzed | PII exposure mitigated through deidentification | False positives/negatives; bias; misclassification |
| Li et al.11 | Factors Predicting Intentions of Adoption and Continued Use of Artificial Intelligence Chatbots for Mental Health: Examining the Role of UTAUT Model, Stigma, Privacy Concerns, and Artificial Intelligence Hesitancy | 2024 | Journal | USA | Cross-sectional online survey | Adoption and continued use of AI chatbots for mental health | Adults / mental health service users | Adoption and continued use of MH chatbots | Moderate | AI chatbots for mental health | Standalone apps / services | Researchers | Moderate to High | Unclear | NR | Yes | Not assessed | Privacy concerns influence adoption | Harmful-advice concerns affect intentions |
| Luo et al.20 | Seeking Emotional and Mental Health Support From Generative AI: Mixed-Methods Study of ChatGPT User Experiences | 2025 | Journal | Multi-country | Mixed-methods user study | Emotional and mental health support user experience | Repeated ChatGPT users seeking emotional or mental health support | Emotional and mental health self-support | High | General-purpose LLM | Standalone consumer use | Researchers | High | Unclear | Subject numbers / anonymization | Yes | Not specified | Privacy, traceability, and liability concerns | Hallucinations, bias, overreliance, weak crisis support |
| Ma et al.7 | Understanding the Benefits and Challenges of Using LLM Conversational Agents for Mental Well-being Support | 2023 | Conference | Multi-country | Qualitative social-media discourse analysis | Mental well-being support | General users discussing Replika | Companionship and mental well-being support | High | Conversational agent | Standalone chatbot | Public platform | Moderate to High | Potentially yes in source | Quoted/paraphrased from public posts | NR | Not assessed | Oversharing and privacy exposure in public discourse | Harmful advice, emotional dependence, inadequate support |
| McBain et al. 40 | Use of Generative AI for Mental Health Advice Among US Adolescents and Young Adults | 2025 | Journal | USA | Cross-sectional national survey | Mental health advice seeking / emotional distress | US adolescents and young adults aged 12-21 | Mental health advice / emotional support | Moderate | General-purpose LLM chatbots | Standalone consumer chatbots | Researchers | Moderate to High | Unclear | NR | Yes | Not assessed | Limited discussion | General concern for clinically intensive needs |
| McBain et al.37 | Competency of Large Language Models in Evaluating Appropriate Responses to Suicidal Ideation: Comparative Study | 2025 | Journal | USA | Observational cross-sectional benchmark study | Suicidal ideation response competency | LLMs benchmarked against expert suicidologist norms | Assess appropriateness of crisis-response judgments | High | General-purpose SOTA LLMs | Evaluative benchmarking environment | Researchers | High | No | Not applicable | Exempt | Not assessed | Minimal | Upward bias—overrating harmful responses as acceptable |
| McBain et al.46 | Evaluating Alignment between Large Language Models and Expert Clinicians in Suicide Risk Assessment | 2025 | Journal | USA | Cross-sectional evaluation of chatbot responses to suicide-related queries | Suicide risk assessment alignment | Simulated crisis seekers / chatbot systems | Direct-response behavior to suicide-related queries | High | General-purpose chatbot systems | Public chatbot evaluation environment | Researchers | High | No | Not applicable | Exempt | Not assessed | Minimal | Intermediate- and lower-risk misalignment; some direct responses persisted |
| Sobowale et al.48 | Evaluating Generative AI Psychotherapy Chatbots Used by Youth: Cross-Sectional Study | 2025 | Journal | USA | Cross-sectional safety audit | Youth psychotherapy chatbot safety | Adolescents and young adults / youth-oriented chatbot users | Direct-to-consumer psychotherapy support for youth | Very High | General-purpose and custom GPT systems | Self-guided, unmonitored youth usage | Researchers / platform providers | Very High | No in study; possible in real-world use | Not applicable | Exempt | Low transparency in privacy / encryption policies | Potential re-identification; complex privacy policies | Crisis failure, weak risk monitoring, poor therapeutic safeguards |
| Pichowicz et al.45 | Performance of Mental Health Chatbot Agents in Detecting and Responding to Crisis Situations | 2025 | Journal | Poland | Cross-sectional evaluation study | Suicidal crisis detection and response | AI-powered mental health chatbot agents | Crisis detection and crisis-response quality | High | AI-powered chatbot agents | Standalone mental-health chatbot apps | Researchers / app developers | High | No | Not applicable | NR | Not assessed | Minimal in study environment | Inadequate crisis detection, missing emergency resources, unsafe or incomplete responses |
| Campellone et al. 50 | Safety and User Experience of a Generative Artificial Intelligence Digital Mental Health Intervention: Exploratory Randomized Controlled Trial | 2025 | Journal | USA | Exploratory randomized controlled trial | Emotional distress / mood and anxiety support | Adults | Conversational CBT and psychoeducation | Moderate | Hybrid generative AI plus proprietary safety layer | Controlled digital mental health intervention | Research institution / study team | High | Yes | Managed under clinical-trial procedures | Yes | Managed via secure infrastructure | Managed via secure storage and encryption | Potential harmful outputs if guardrails fail |
| Rousmaniere et al.41 | Large Language Models as Mental Health Resources: Patterns of Use in the United States | 2025 | Journal | USA | Cross-sectional survey-based study | General mental health support and therapy-related goals | U.S. residents with ongoing mental health conditions | Self-guided mental health and emotional support | High | Consumer general-purpose LLM chatbots | Personal unsupervised use | Researchers / survey platform | High | Collected but anonymized in analysis | Yes | Yes | Not assessed | Disclosure of MH information to non-medical platforms | Harmful or inappropriate responses reported by minority of users |
| Scholich et al.44 | A Comparison of Responses from Human Therapists and Large Language Model–Based Chatbots to Assess Therapeutic Communication: Mixed Methods Study | 2025 | Journal | USA | Mixed-methods comparison study | Depression and anxiety support patterns | General-purpose chatbots and licensed therapists | Therapeutic communication assessment | High | General-purpose LLM-based chatbots | General-purpose chatbot platforms | Researchers | High | No | Not applicable / NR | NR | NR | NR | Insufficient inquiry, directive advice, poor crisis handling |
| Spallek et al. 42 | Can we use ChatGPT for Mental Health and Substance Use Education? Examining Its Quality and Potential Harms | 2023 | Journal | Australia | Viewpoint with case-study style content evaluation | Mental health and substance use education | General public / learners | Psychoeducation / answering MH & SUD questions | High | General-purpose LLM | Standalone chatbot | Public portals / researchers / OpenAI outputs | Medium/High | No | Portal queries deidentified | Not applicable | Not assessed | Not central | Incorrect or incomplete educational guidance |
| Stamatis et al.43 | Beyond Simulations: What 20,000 Real Conversations Reveal About Mental Health AI Safety | 2026 | Journal | USA | Ecological audit / log analysis | Mental health AI safety in naturalistic use | Real-world help-seekers | Direct-to-consumer therapeutic companion / support | Very High | Domain-aligned purpose-built LLM | Direct-to-consumer deployment | Platform provider / institutional research | Extreme | Yes in raw logs | HIPAA-compliant scrubbing for analysis | Yes | Not reported | Minimal in study due to scrubbing | Rare tail-risk failure in NSSI detection |
| Zaia et al. 49 | Perceived Benefits and Limitations of a Generative AI Chatbot for Mental Health Support: An Exploratory Mixed-Methods Study | 2025 | Journal | New Zealand | Exploratory mixed-methods study | Mental health support / emotional support | Users of the Character.AI 'Psychologist' chatbot | Mental-health support and emotional support | High | General-purpose generative AI persona bot | Platform-hosted chatbot | Researchers / platform context | High | Unclear | Anonymization reported | Yes | General concerns only | Data privacy concerns | Hallucinations, misinformation, bias, emotional dependency |

The table presents extracted data for all 33 included studies. Key variables are shown; the complete extraction dataset is available from the corresponding author upon request. Column headers correspond to variables defined in the Methods section.

***Note.*** *MH = mental health; LLM = large language model; PII = personally identifiable information. Empty cells indicate the variable was not reported or not applicable in the original study. Selected columns shown; full dataset available on request.*

**Supplementary Figure S1. Risk-of-bias ratings across evaluation domains (n = 33).**

**
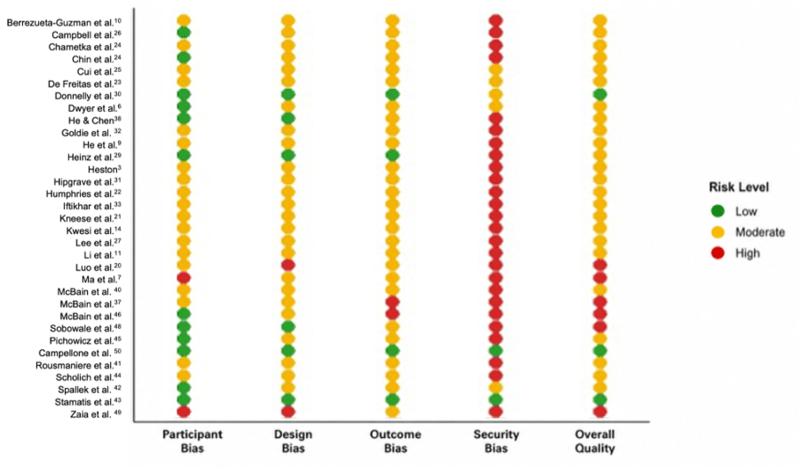
**

Risk-of-bias ratings are displayed for each of the 33 included studies across five evaluation domains: Participant Bias, Design Bias, Outcome Bias, Security Bias, and Overall Quality. Color coding: green = low risk; yellow/orange = moderate risk; red = high risk. The Security Bias domain showed the highest proportion of high-risk ratings (26/33, 78.8%), reflecting limited use of formal adversarial testing and structured security evaluation methods across the included literature. Studies are identified by their reference numbers from the main manuscript: ⁶˒⁷˒⁹˒¹⁴˒²¹...⁵⁴.
